# Supplementary material for: Exosome-Mediated Activation of the Prostasin-Matriptase Serine Protease Cascade in B Lymphoma Cells
Source: MDPI journal article supplement (doi:10.3390/cancers15153848), 2023-07-28
Supplement: s1 [file s1]

All uncropped images are overlays of antibody blot & protein staining with MW markers)

Figure 1c Uncropped

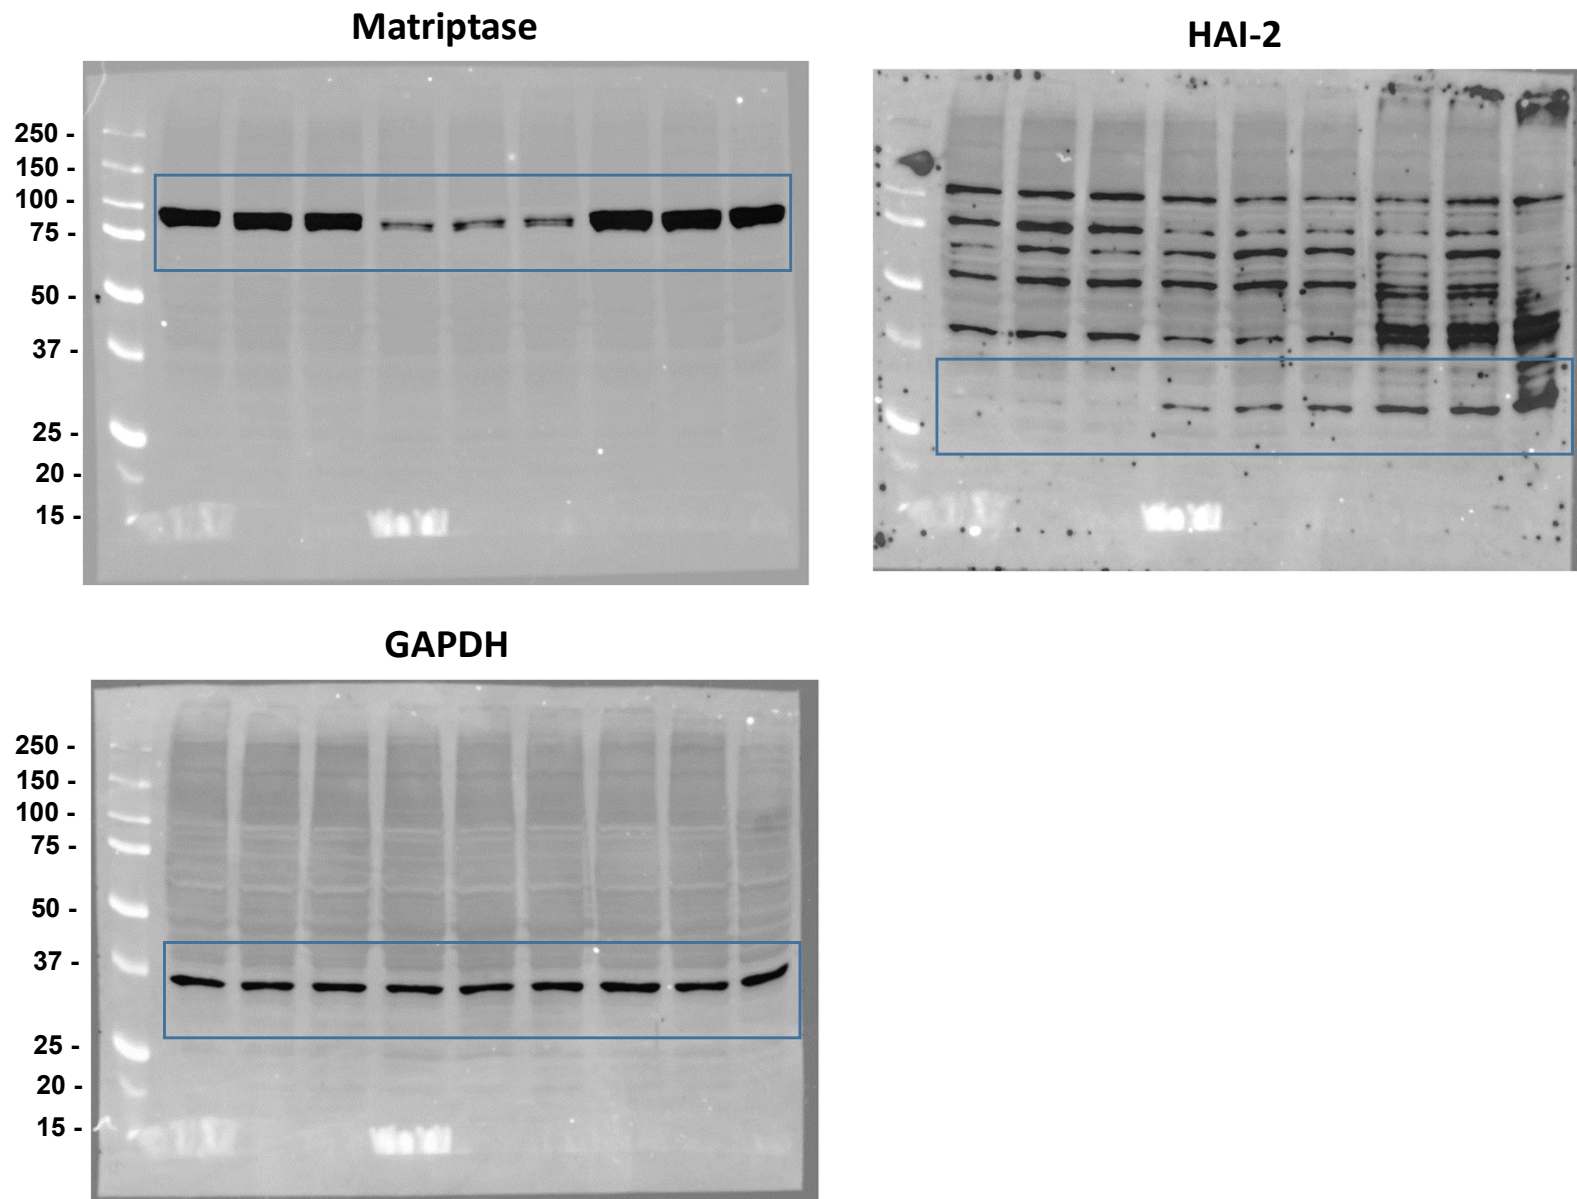

Figure 2a,b Uncropped

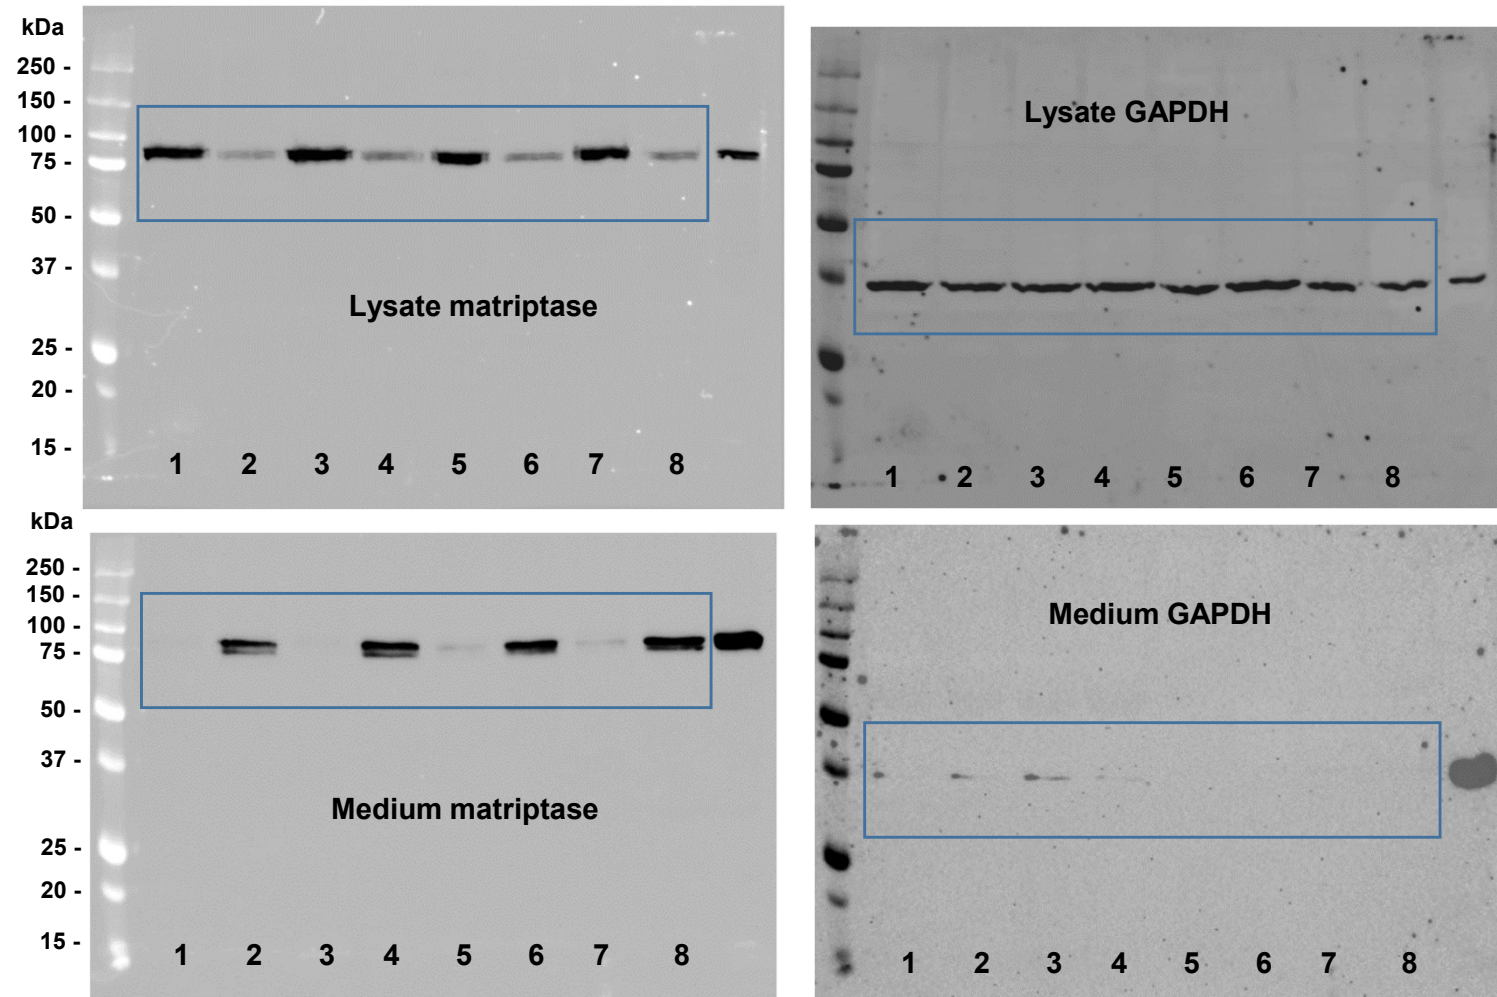

Figure 2e,g Uncropped

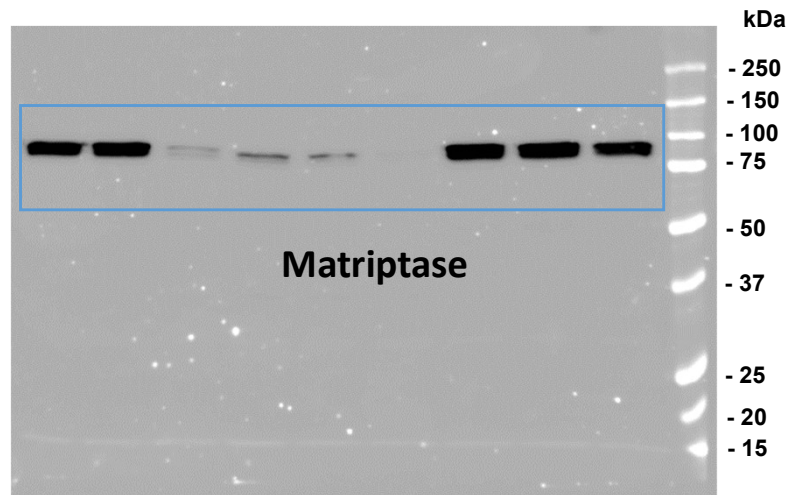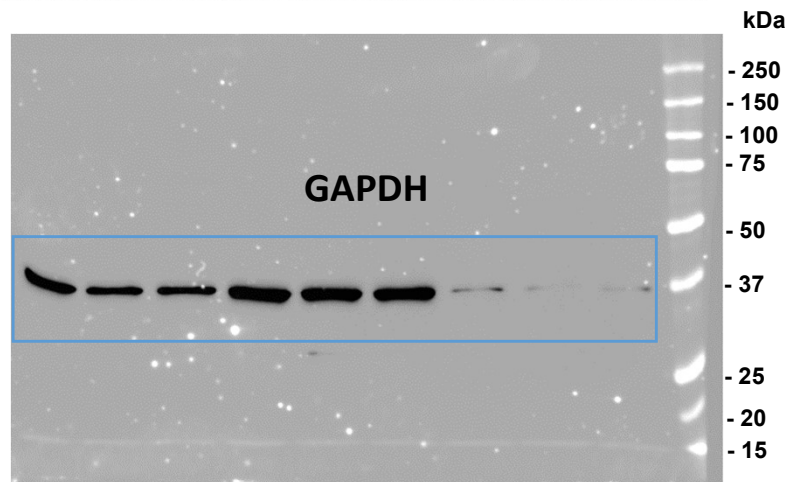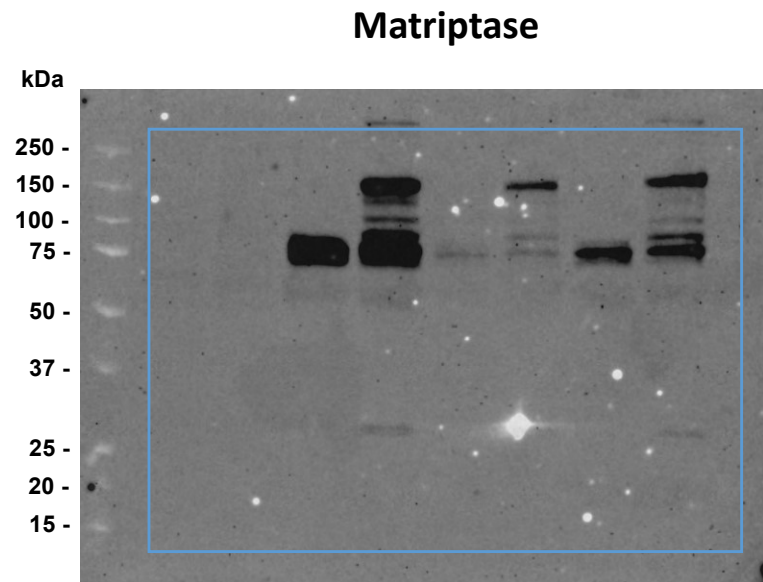



Western blot analysis of Matripatse and GAPDH protein levels in H1299 cells. The blots show protein bands for Matripatse (left column) and GAPDH (right column) across eight lanes. Molecular weight markers (kDa) are indicated on the left of each blot. Matripatse bands are highlighted with a blue box, and GAPDH bands are highlighted with a blue box. The GAPDH bands are consistent across all lanes, indicating equal protein loading.

## Namalwa

Figure 5a,c,d Uncropped

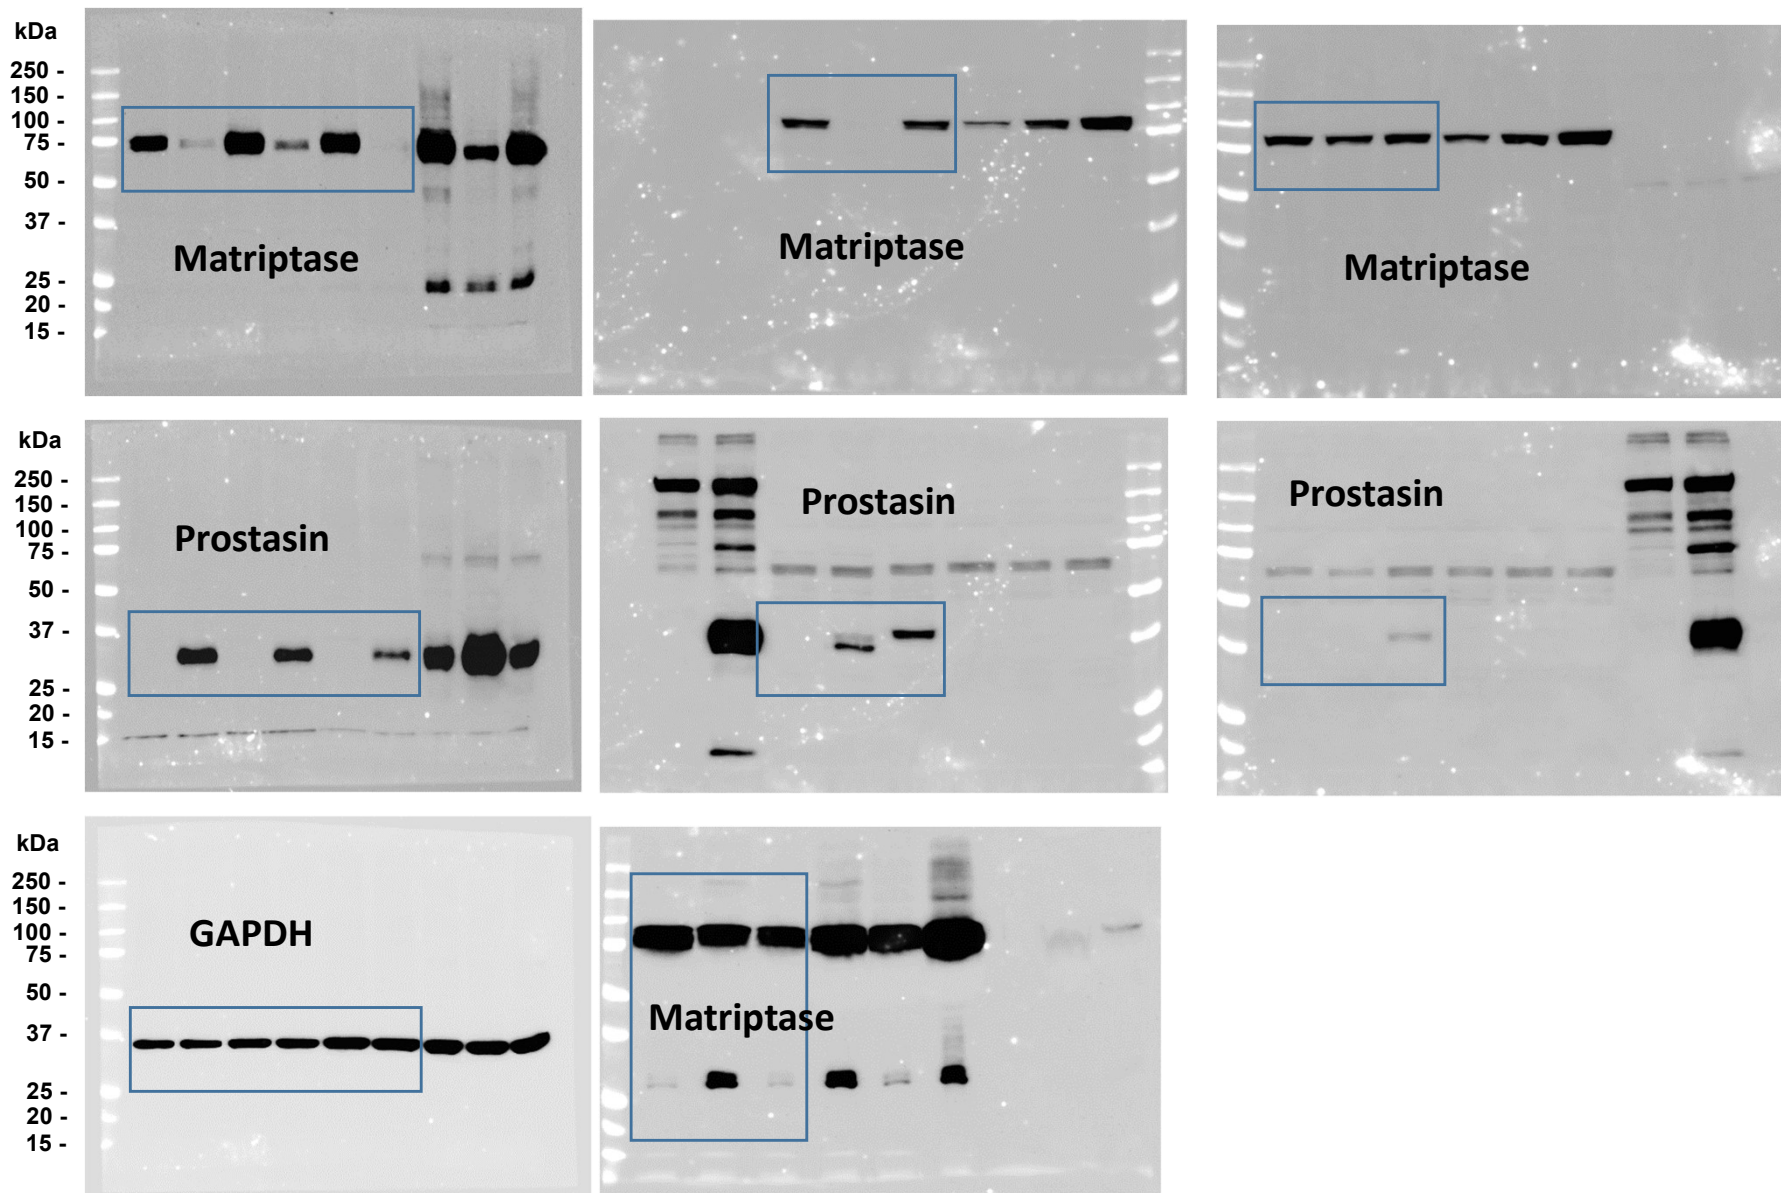

Figure 6i Uncropped

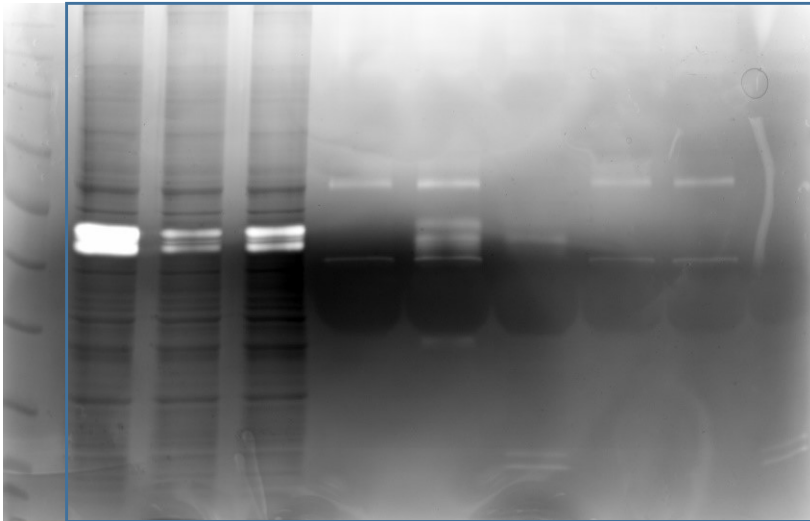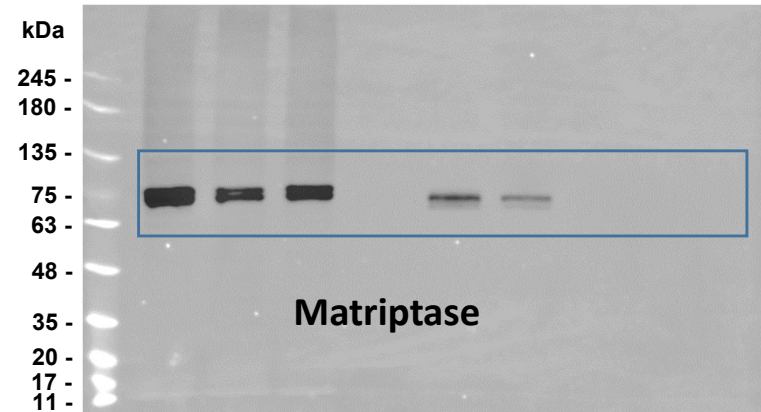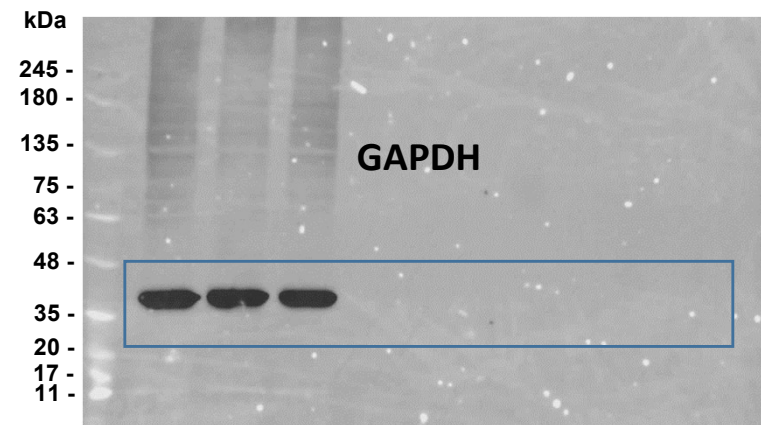

**Figure 6j Uncropped**

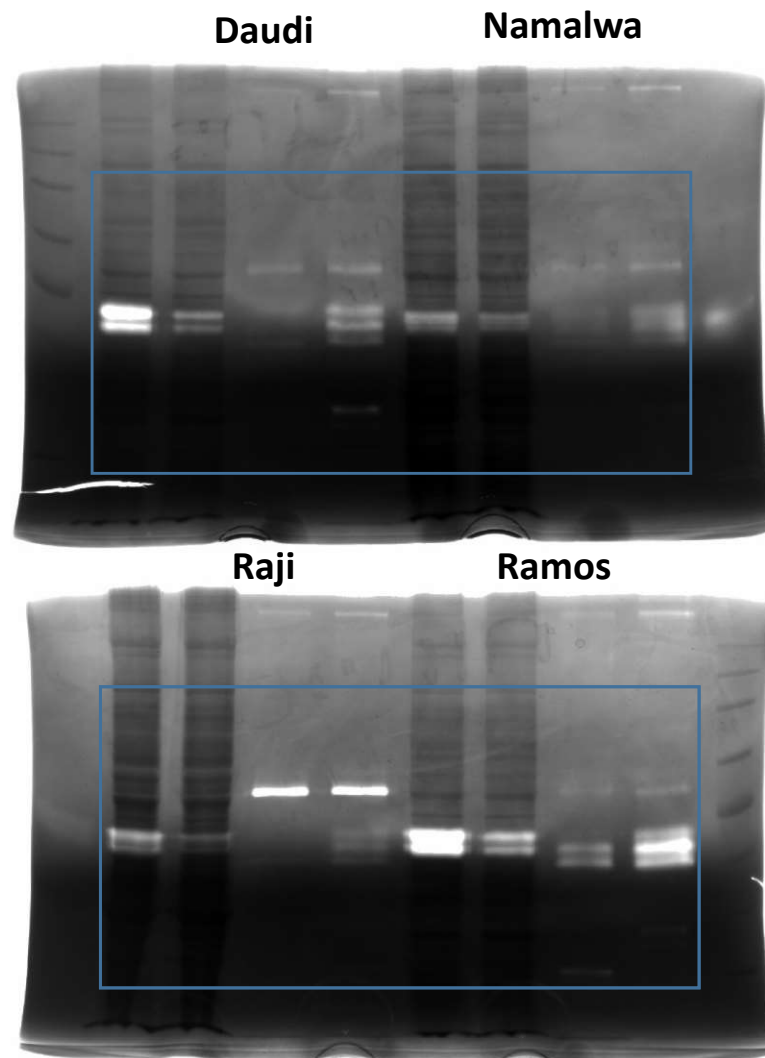



Figure S1 Uncropped

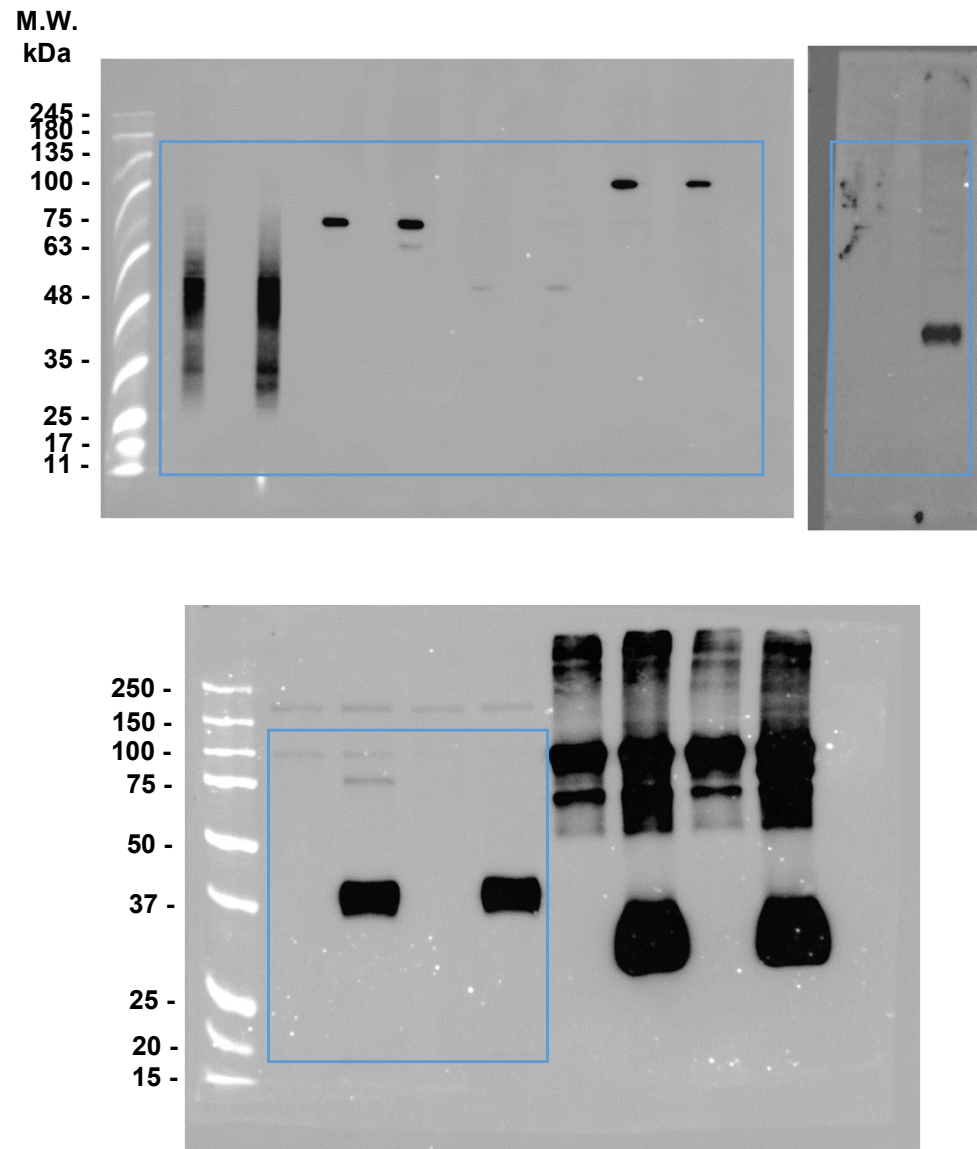



**Figure S2 Uncropped**

**Gelatin gel**

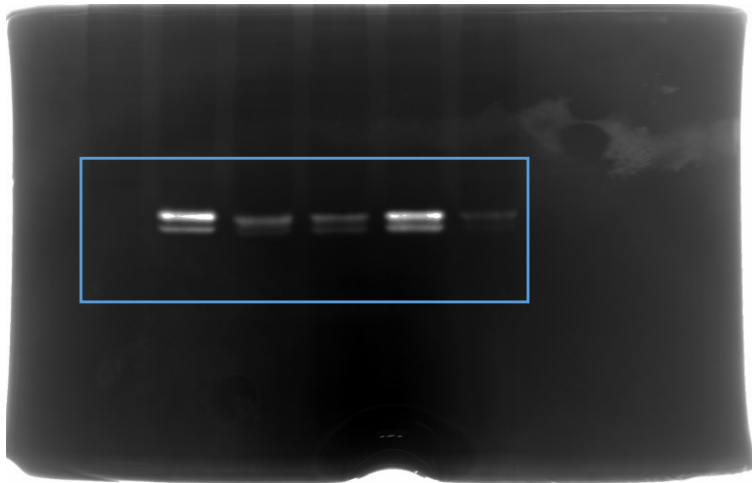

**Western blotting**

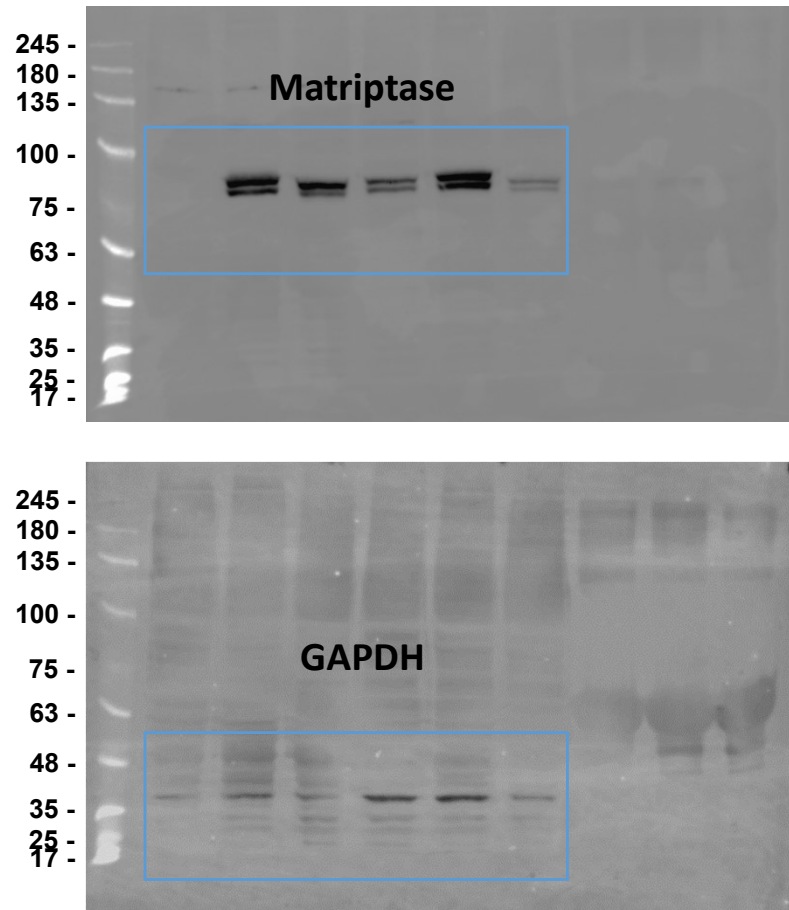

**File S1.** The original western blots.
