# Supplementary material for: Exosome-Mediated Activation of the Prostasin-Matriptase Serine Protease Cascade in B Lymphoma Cells
Source: MDPI journal article supplement (doi:10.3390/cancers15153848), 2023-07-28
Supplement: s1 [file s1]

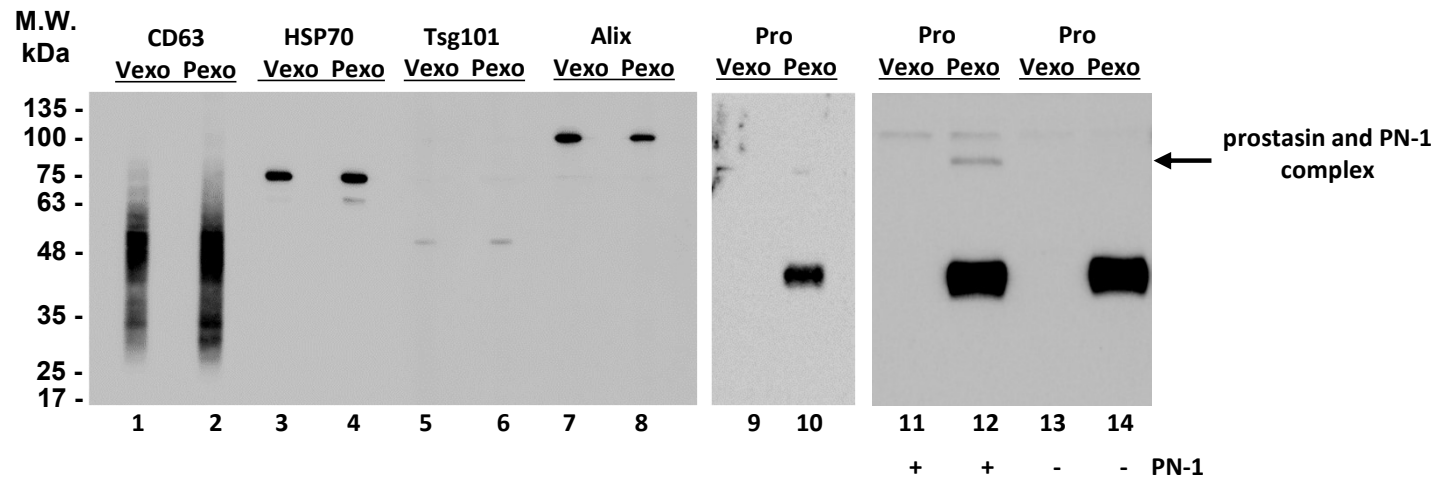

**Figure S1.** Western blot analysis of exosomes. The vector control exosomes (Vexo, 10  $\mu$ g) and prostatic acid phosphatase exosomes (Pexo, 10  $\mu$ g) prepared from the HEK293T cells were tested with four different exosome markers using antibodies against CD63, HSP70, Tsg101, and Alix (all from Santa Cruz Biotechnology). Lanes 1&2, CD63; lanes 3&4, HSP70; lanes 5&6, Tsg101; lanes 7&8, Alix. The panel of HSP70 membrane was stripped and re-blotted with the prostatic acid phosphatase antibody (lanes 9&10). In a different experiment (right panel, lanes 11-14), the exosomes were incubated with 0.5  $\mu$ g of purified mouse protease nexin 1 (PN-1) for 2 hours at 37°C before SDS-PAGE/western blotting.

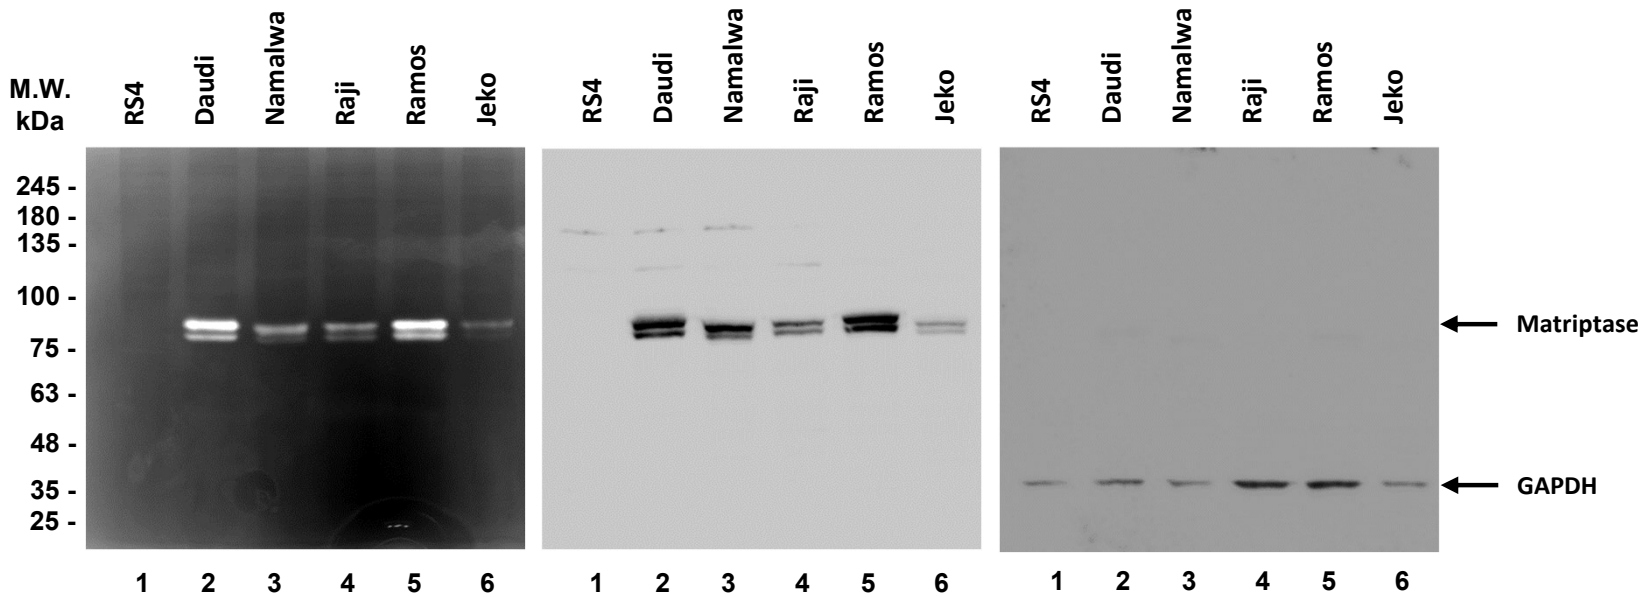

**Figure S2.** Gelatin zymography and western blot analysis of B lymphoma cell lines. Lysate from  $2 \times 10^5$  cells of each line was analyzed in gelatin gel (left panel), western blotting with matriptase antibody (AF3946, middle panel) and western blotting with GAPDH antibody (right panel). Lanes 1, RS4; lanes 2, Daudi; lanes 3 Namalwa; lanes 4, Raji; lanes 5, Ramos; lanes 6, Jeko. RS4 cells do not express matriptase (middle panel, lane 1) and do not have matriptase-associated gelatinase activity (left panel, lane 1).
